# Supplementary material for: Detecting high-emitting methane sources in oil/gas fields using satellite observations
Source: Copernicus journal article supplement (doi:10.5194/acp-18-16885-2018), 2018-11-29
Supplement: Supplementary file 1 [file acp-18-16885-2018-supplement.zip]

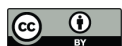

## *Supplement of*

# **Detecting high-emitting methane sources in oil/gas fields using satellite observations**

**Daniel H. Cusworth et al.**

*Correspondence to:* Daniel H. Cusworth ([dcusworth@fas.harvard.edu](mailto:dcusworth@fas.harvard.edu))

- [acp-18-16885-2018-supplement-title-page.pdf](#)
- [acp\\_code](#)
  - [example\\_H.rds](#)
  - [example\\_acp.R](#)
  - [example\\_foot.nc](#)
  - [wells.RDS](#)

The copyright of individual parts of the supplement might differ from the CC BY 4.0 License.
